# Supplementary material for: Assembling Ni–Co phosphides/carbon hollow nanocages and nanosheets with carbon nanotubes into a hierarchical necklace-like nanohybrid for electrocatalytic oxygen evolution reaction
Source: Royal Society of Chemistry journal article supplement (doi:10.1039/c8nr04776f), 2018-01-01
Supplement: c8nr04776f1.pdf [file c8nr04776f1.pdf]

## Supplementary Information

### Assembling Ni-Co phosphides/carbon hollow nanocages and nanosheets with carbon nanotubes into a hierarchical necklace-like nanohybrid for electrocatalytic oxygen evolution reaction

Yingji Zhao, Guoli Fan, Lan Yang, Yanjun Lin and Feng Li\*

State Key Laboratory of Chemical Resource Engineering, Beijing Advanced Innovation Center for Soft Matter Science and Engineering, Beijing University of Chemical Technology, No.15, Beisanhuan East Road, Beijing 100029, China. Email: lifeng@mail.buct.edu.cn

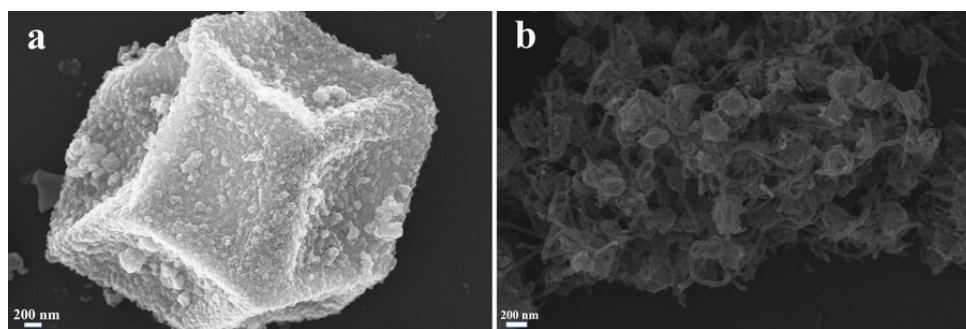

**Fig.S1** SEM images of (a) NiCoP/C and (b) CNTs@CoP/C reference samples.

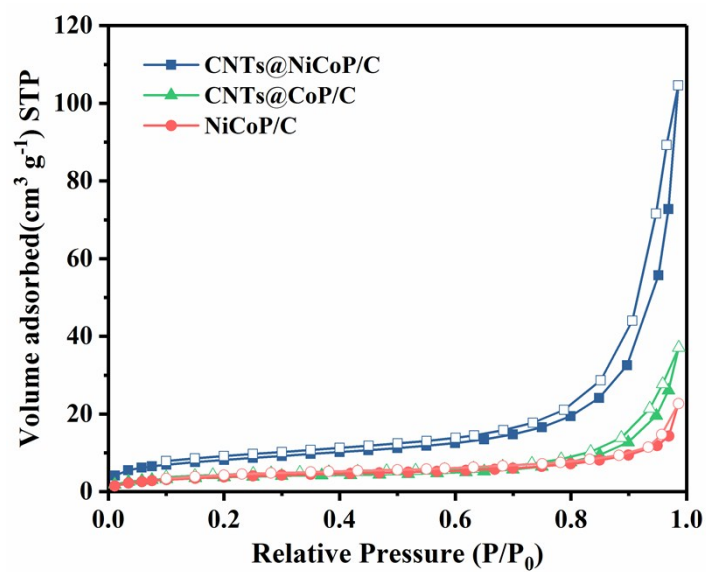

**Fig.S2** Low-temperature N<sub>2</sub> adsorption-desorption isotherms of different samples.

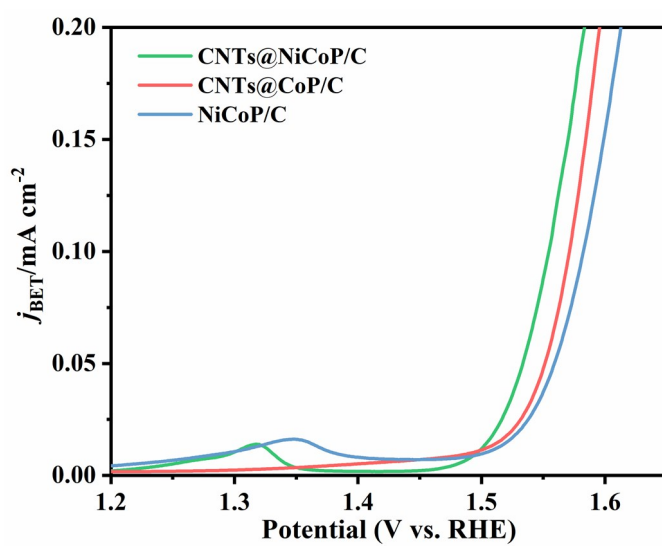

**Fig.S3** LSV curves normalized to the BET surface areas of different samples

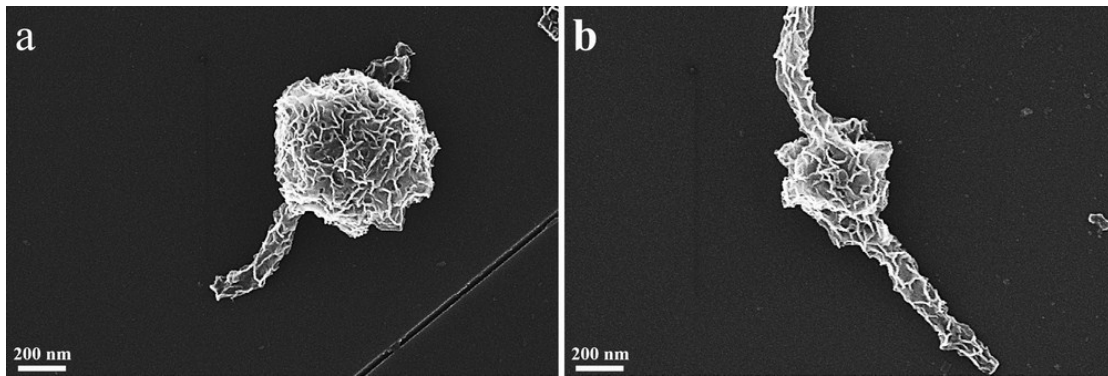

**Fig.S4** SEM images of CNTs@Ni<sub>1</sub>Co<sub>1</sub>-LDH/ZIF-67 (a) and CNTs@Ni<sub>3</sub>Co<sub>1</sub>-LDH/ZIF-67 (b) composite precursors.

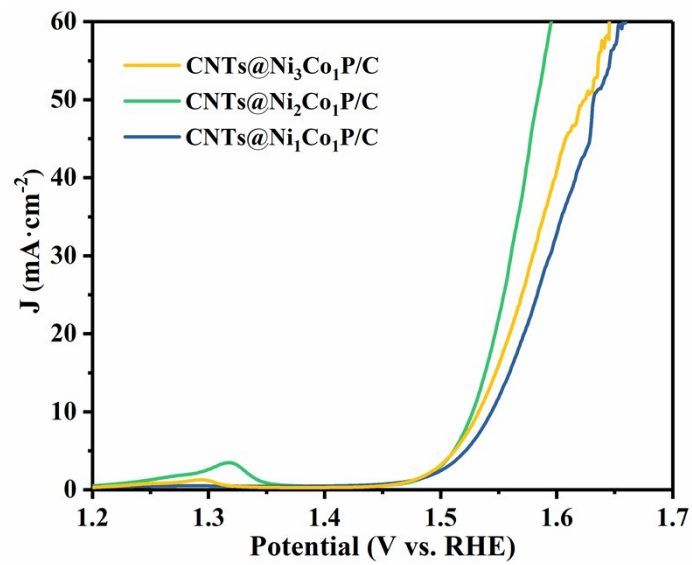

**Fig.S5** LSV curves of different Ni content of samples

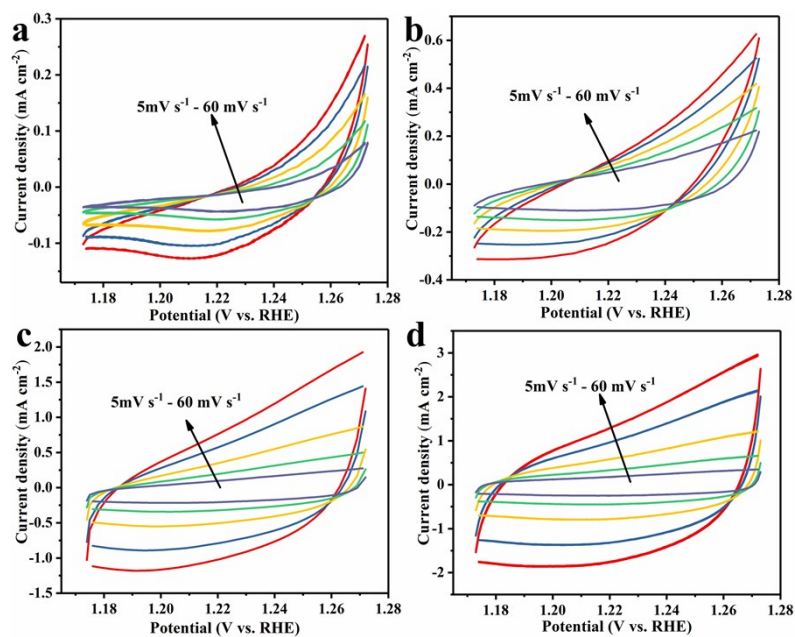

**Fig.S6** Cyclic voltammety curves of (a) CNTs@NiCo-LDH/ZIF-67, (b) NiCoP/C, (c) CNTs@CoP/C, (d) CNTs@NiCoP/C at different scan rate from 5 to 60  $\text{mV s}^{-1}$

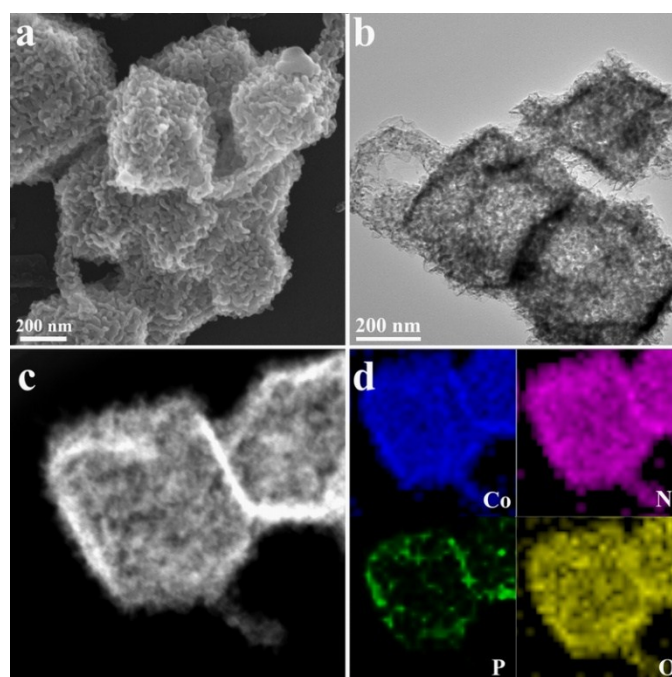

**Fig.S7** SEM (a), TEM (b), STEM (c, d) images of CNTs@NiCoP/C after durability test

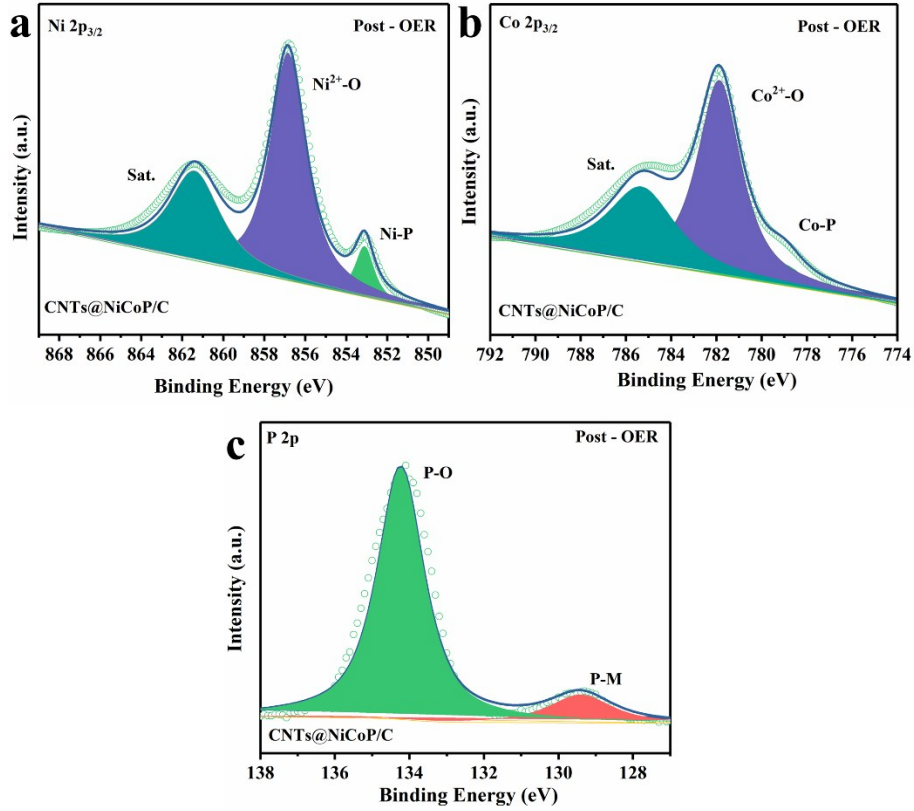

**Fig.S8** XPS of Ni 2p (a), Co 2p (b) and P 2p (c) regions for CNTs@NiCoP/C after OER.

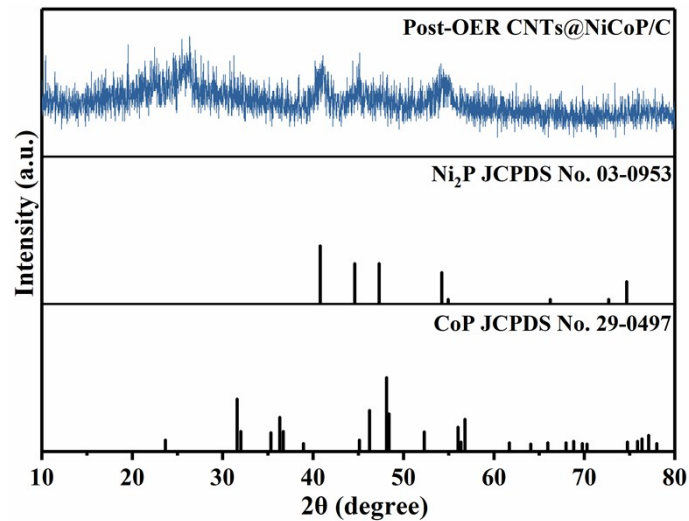

**Fig.S9** XRD patterns of CNTs@NiCoP/C after OER.

**Table S1** Summary for the properties of recent reported OER electrocatalysts.

| Electrocatalysts <sup>a</sup>                                      | Overpotential (mV)<br>at 10 mA cm <sup>-2</sup> | Tafel<br>(mV dec <sup>-1</sup> ) | Refs.     |
|--------------------------------------------------------------------|-------------------------------------------------|----------------------------------|-----------|
| NiCoP/C nanoboxes                                                  | 330                                             | 96                               | [44]      |
| Ni <sub>0.6</sub> Co <sub>1.4</sub> P nanocages                    | 300                                             | 80                               | [45]      |
| h-CoNiP/rGO                                                        | 280                                             | 65.2                             | [46]      |
| Ni <sub>2</sub> P@NC                                               | 320                                             | 50                               | [47]      |
| CoP/rGO                                                            | 340                                             | 66                               | [48]      |
| Multishelled Ni <sub>2</sub> P                                     | 270                                             | 40.4                             | [49]      |
| Co <sub>2</sub> P/NPCNT                                            | 370                                             | 53                               | [50]      |
| Ni <sub>2</sub> P-CoP                                              | 320                                             | 69                               | [51]      |
| Ni <sub>0.88</sub> Co <sub>1.22</sub> Se <sub>4</sub> <sup>b</sup> | 320                                             | 78                               | [52]      |
| CoP <sup>c</sup>                                                   | 400                                             | 57                               | [53]      |
| Co <sub>2</sub> P@Co/N-C                                           | 320                                             | 48.8                             | [54]      |
| CoP NR/C                                                           | 320                                             | 71                               | [18]      |
| CNTs@NiCoP/C                                                       | 297                                             | 57.35                            | This work |

<sup>a</sup> deposited on glassy carbon electrode. <sup>b</sup> hollow microparticles. <sup>c</sup> hollow polyhedron.
